# Supplementary material
Source: PubMed Central journal article supplement (PMC8407944)
Supplement: mmc2.pdf [file mmc2.pdf]

# COVID-19 Questionnaire

Questionnaire completed: \_\_\_\_\_

Questionnaire rempli: \_\_\_\_\_

---

---

## COVID-19 Questionnaire

Before you begin this questionnaire, do you wish to receive information about it in French or in English?

Avant de commencer le questionnaire, souhaitez-vous recevoir des informations sur ce questionnaire en français ou en anglais?

- English/Anglais  
 French/Français

The purpose of this questionnaire is to better understand how the COVID-19 outbreak has affected you. If you agree to complete the questionnaire, you will be asked to complete it either by phone, in-person or by online survey. It will ask about your physical and mental wellbeing, your daily activities, and your symptoms during the COVID-19 pandemic. It should take you between 10-15 minutes to complete.

The survey data will be securely stored in the same REDCap database as the rest of your clinical information that resides on the Clinical Research Unit at the Cumming School of Medicine at the University of Calgary. Please refer to your main study consent form for more information on this database.

Participation in the questionnaire is completely voluntary. There are no benefits to you for completing this additional questionnaire. Some of the questions are personal and some may be sensitive. You can choose not to answer these questions if you wish. You can choose not to complete this questionnaire and still remain in the study.

If you have questions about this questionnaire please speak with the research coordinator or investigator. Contact information is listed on your main study consent form.

If you have questions about your rights as a participant or about ethical issues related to this questionnaire, you can talk to someone who is not involved in the study at all. Please see your main study consent form for contact details for this person.

For participants completing the questionnaire by online survey:

By completing this questionnaire and clicking "submit" at the end, you are indicating that you have read this consent information and agree to the collection of the information contained within it. You are free to not answer any question simply by selecting the "Prefer not to answer" option.

Ce questionnaire vise à mieux comprendre dans quelle mesure la COVID-19 influe sur vous. Si vous acceptez de remplir ce questionnaire, vous pourrez y répondre soit par téléphone, en personne ou en ligne. Les questions porteront sur votre santé physique et mentale, vos activités du quotidien, et vos symptômes durant la pandémie de la COVID-19. Il faudra prévoir entre 10 et 15 minutes pour répondre au questionnaire.

Les données tirées de l'enquête seront conservées en toute sécurité dans la même base de données REDCap que le reste de vos informations cliniques. Vos données seront conservées à l'unité de recherche clinique de la Cumming School of Medicine de l'Université de Calgary. Veuillez vous référer au formulaire de consentement de l'étude principale pour de plus amples informations au sujet de cette base de données.

Il n'y a aucun bienfait associé à la réponse à ce questionnaire. Certaines questions sont de nature personnelle et d'autres pourraient être de nature sensible. Vous aurez l'option de ne pas répondre à ces questions si vous le souhaitez.

La réponse au questionnaire est entièrement volontaire. Vous pouvez choisir de ne pas remplir ce questionnaire et tout même demeurer dans l'étude.

Si vous avez des questions, veuillez en parler au coordonnateur ou au chercheur de la recherche. Leurs coordonnées figurent sur le formulaire de consentement de l'étude principale.

Pour toute question concernant vos droits à titre de participant ou des questions éthiques liées à ce questionnaire, vous pouvez en discuter avec votre médecin ou avec quelqu'un qui n'intervient pas directement dans l'étude. Veuillez consulter le formulaire de consentement de l'étude principale pour obtenir les coordonnées des personnes concernées.

Pour les participants qui répondent au questionnaire en ligne:

En répondant à ce questionnaire et en cliquant sur "soumettre" une fois terminé, vous indiquez avoir pris connaissance des informations relatives au consentement et vous consentez à la collecte de vos informations. Vous êtes libre de ne pas répondre à toute question en sélectionnant l'option "Préfère ne pas répondre".

Did you get diagnosed with COVID-19 (official test confirming diagnosis)?

Avez-vous été atteint(e) de la COVID-19 (test officiel confirmant le diagnostic)?

- Yes/Oui
- No/Non
- Unsure/Incertain
- Prefer not to answer/Préfère ne pas répondre

Select the symptoms you have experienced:

Cochez tous les symptômes que vous avez ressentis:

- Fever/Fièvre
- Cough/Toux
- Fatigue
- Skin rash/Éruptions cutanées
- Loss of smell/Perte d'odorat
- Shortness of breath/Essoufflement
- No symptoms/Aucun symptôme
- Other/Autre

If you selected other, please specify:

Si vous avez sélectionné autre, veuillez préciser:

---

Did you experience symptoms associated with COVID-19 without an official diagnosis?

Avez-vous ressenti des symptômes de la COVID-19 sans avoir reçu de diagnostic officiel?

- Yes/Oui  
 No/Non  
 Prefer not to answer/Préfère ne pas répondre

Select the symptoms you have experienced:

Cochez tous les symptômes que vous avez ressentis:

- Fever/Fièvre  
 Cough/Toux  
 Fatigue  
 Skin rash/Éruptions cutanées  
 Loss of smell/Perte d'odorat  
 Shortness of breath/Essoufflement  
 Other/Autre

If you selected other, please specify:

Si vous avez sélectionné autre, veuillez préciser:

---

If you did not get an official diagnosis of COVID-19, how concerned are you about contracting it?

Si vous n'avez pas reçu de diagnostic officiel de la COVID-19, quel est votre niveau d'inquiétude de la contracter?

- Very much/Très inquiet  
 Slightly/Un peu inquiet  
 Not at all/Pas du tout inquiet  
 Prefer not to answer/Préfère ne pas répondre

For the following questions, when we say "the confinement period", we mean when provincial governments asked everyone to stay home to lessen the impact of COVID-19. We recognize this happened at different times for each province. The list below lets you know what date we are referring to for your province so that you can answer the questions with this date in mind.

Pour les questions suivantes, lorsque nous mentionnons "la période de confinement", nous voulons dire lorsque les gouvernements provinciaux ont demandé à tout le monde de rester à la maison pour réduire l'impact de la COVID-19. Nous reconnaissons que cela s'est produit à des moments différents pour chaque province. La liste ci-dessous vous permet de savoir à quelle date nous faisons référence pour que vous puissiez répondre aux questions.

British Columbia/Colombie-Britannique: March 17 2020/17 mars 2020

Alberta: March 17 2020/17 mars 2020

Ontario: March 17 2020/17 mars 2020

Quebec/Québec: March 13 2020/13 mars 2020

Were you hospitalized since the beginning of the confinement period?

Avez-vous été hospitalisé(e) depuis le début de la période de confinement?

- Yes/Oui  
 No/Non  
 Prefer not to answer/Préfère ne pas répondre

For what reason were you hospitalized?

Pour quelle raison avez-vous été hospitalisé(e)?

- Hospitalized related to your COVID-19 symptoms/Hospitalisation en lien avec vos symptômes de la COVID 19
- Hospitalized related to your Parkinson's disease/Hospitalisation en lien avec vos symptômes de Parkinson
- Other reason for hospitalization/Autre raison de l'hospitalisation
- Prefer not to answer/Préfère ne pas répondre

Were you admitted to the intensive care unit (ICU)?

Avez-vous été admis à l'unité des soins intensifs?

- Yes/Oui
- No/Non
- Unsure/Incertain
- Prefer not to answer/Préfère ne pas répondre

Have you been in close physical contact with someone, who tested positive for COVID-19?

Avez-vous été en contact physique direct avec une personne qui a reçu un diagnostic positif de la COVID-19?

- Yes/Oui
- No/Non
- Unsure/Incertain
- Prefer not to answer/Préfère ne pas répondre

What is your relationship to that person?

Quelle est votre relation avec cette personne?

---

In your opinion, what is the biggest impact of the confinement on your daily life?

Selon vous, quel est le plus grand impact du confinement sur votre quotidien?

- My mood/Mon moral
- My physical activities/Mes activités sportives
- My medical appointments/Mes rendez-vous médicaux
- My work/Mon travail
- My family/Ma famille
- Other/Autre
- Prefer not to answer/Préfère ne pas répondre

If selected other, please specify:

Si vous avez sélectionné autre, veuillez préciser:

---

How are you communicating with your loved ones during the confinement period? (select all options that apply)

Comment communiquez-vous avec vos proches durant la période de confinement? (cochez toutes les situations qui vous concernent)

- Phone call/Appel téléphonique
- Video conference/Vidéoconférences (Skype, Zoom, FaceTime, etc.)
- Email
- Postal mail/Courrier postal
- Other/Autre
- Prefer not to answer/Préfère ne pas répondre

If you selected other, please specify:

Si vous avez sélectionné autre, veuillez préciser:

---

BEFORE the confinement period, how often did you leave your home?

AVANT la période de confinement, à quelle fréquence sortiez-vous de chez vous?

- 1-2 times per week/1-2 fois par semaine
- 3-4 times a week/3 à 4 fois par semaine
- 5-6 times per week/5-6 fois par semaine
- 7 or more times per week/7 fois et plus par semaine
- I do not go out/Je ne sors pas
- Prefer not to answer/Préfère ne pas répondre

DURING the confinement period, how often did you leave your home?

DURANT la période de confinement, à quelle fréquence sortez-vous de chez vous?

- 1-2 times per week/1-2 fois par semaine
- 3-4 times a week/3 à 4 fois par semaine
- 5-6 times per week/5-6 fois par semaine
- 7 or more times per week/7 fois et plus par semaine
- I do not go out/Je ne sors pas
- Prefer not to answer/Préfère ne pas répondre

DURING the confinement period, when your leave home, what is the reason(s)?

DURANT la période de confinement, quand vous sortez de chez vous, pour quelle(s) raison(s) le faites-vous?

- Groceries or Pharmacy/Épicerie ou Pharmacie
- Take a walk or do physical exercises/Prendre une marche ou faire de l'exercice
- Visit a family member or a friend/Visiter de la famille ou des amis
- Talk to neighbours/Parler aux voisins
- Go to work or volunteering/Aller travailler ou bénévolat
- Other/Autre

If you selected other, please specify:

Si vous avez sélectionné autre, veuillez préciser:

---

Did you live by yourself before the confinement period?

Avant la période de confinement, habitiez-vous seul?

- Yes/Oui
- No/Non
- Prefer not to answer/Préfère ne pas répondre

Has this situation changed since the confinement period?

Depuis la période de confinement, est-ce que cette situation a changé?

- Yes/Oui
- No/Non
- Prefer not to answer/Préfère ne pas répondre

Since the beginning of the confinement, have you had any change in the following motor symptoms?

Depuis le début de la période de confinement, avez-vous remarqué des changements au niveau des symptômes moteurs suivants?

- Tremor/Tremblements
- Muscle stiffness (rigidity)/Rigidité musculaire
- Slowness/Lenteur
- Balance problems/Troubles de l'équilibre
- No change/Aucun changement
- I don't have these symptoms/Je n'ai pas ces symptômes
- Other/Autre
- Prefer not to answer/Préfère ne pas répondre

If you selected other, please specify:

Si vous avez sélectionné autre, veuillez préciser:

---

For your tremor, what kind of change have you noticed?

Pour vos tremblements, quel genre de changement avez-vous remarqué?

- Increase/Augmentation
- Decrease/Diminution
- Changes from day to day/Change de jour en jour
- Prefer not to answer/Préfère ne pas répondre

For your muscle stiffness (rigidity), what kind of change have you noticed?

Pour votre rigidité musculaire, quel genre de changement avez-vous remarqué?

- Increase/Augmentation
- Decrease/Diminution
- Changes from day to day/Change de jour en jour
- Prefer not to answer/Préfère ne pas répondre

For your slowness, what kind of change have you noticed?

Pour votre lenteur, quel changement avez-vous remarqué?

- Increase/Augmentation
- Decrease/Diminution
- Changes from day to day/Change de jour en jour
- Prefer not to answer/Préfère ne pas répondre

For your balance problems, what kind of change have you noticed?

Pour vos troubles d'équilibre, quel changement avez-vous remarqué?

- Increase/Augmentation
- Decrease/Diminution
- Changes from day to day/Change de jour en jour
- Prefer not to answer/Préfère ne pas répondre

Since the beginning of the confinement, have you had any change in the following non-motor symptoms?

Depuis le début de la période de confinement, avez-vous remarqué des changements au niveau des symptômes non moteurs suivants?

- Depression/Dépression
- Anxiety/Anxiété
- Cognitive difficulties (trouble with concentration, memory and thinking problems, etc.)/Troubles cognitifs (difficultés de concentration, d'organisation, troubles de la mémoire, etc.)
- No change/Aucun changement
- I don't have these symptoms/Je n'ai pas ces symptômes
- Other/Autre
- Prefer not to answer/Préfère ne pas répondre

If you selected other, please specify:

Si vous avez sélectionné autre, veuillez préciser:

---

For your depression, what kind of change have you noticed?

Pour votre dépression, quel genre de changement avez-vous remarqué?

- Increase/Augmentation
- Decrease/Diminution
- Changes from day to day/Change de jour en jour
- Prefer not to answer/Préfère ne pas répondre

For your anxiety, what kind of change have you noticed?

Pour votre anxiété, quel genre de changement avez-vous remarqué?

- Increase/Augmentation
- Decrease/Diminution
- Changes from day to day/Change de jour en jour
- Prefer not to answer/Préfère ne pas répondre

For your cognitive difficulties, what kind of change have you noticed?

Pour vos troubles cognitifs, quel genre de changement avez-vous remarqué?

- Increase/Augmentation
- Decrease/Diminution
- Changes from day to day/Change de jour en jour
- Prefer not to answer/Préfère ne pas répondre

Since the beginning of the confinement period, have you experienced changes in headaches?

Depuis le début de la période de confinement, avez-vous remarqué des changements dans vos maux de tête?

- Got better/Se sont améliorés
- Got worse/Se sont empirés
- No change/Pas de changement
- I don't have headaches/Je n'ai pas des maux de têtes
- Prefer not to answer/Préfère ne pas répondre

Since the beginning of the confinement period, have you experienced changes in your sleep quality?

Depuis le début de la période de confinement, avez-vous remarqué des changements dans la qualité de votre sommeil?

- Got better/S'est améliorée
- Got worse/S'est empirée
- No change/Pas de changement
- Prefer not to answer/Préfère ne pas répondre

Since the beginning of the confinement period, have you experienced altered arousal (coma, seizures or delirium)?

Depuis le début de la période de confinement, avez-vous remarqué des changements dans votre niveau d'éveil (coma, convulsions ou délire)?

- Increase/Augmentation
- Decrease/Diminution
- No change/Pas de changement
- Not applicable/Non applicable
- Prefer not to answer/Préfère ne pas répondre

Have you made changes to your Parkinson's medication during the confinement period (e.g. change in dose or how often you take your pills)?

Avez-vous modifié vos médicaments de Parkinson pendant la période de confinement (par exemple, changement de dose ou à quelle fréquence vous prenez vos comprimés)?

- Yes/Oui
- No/Non
- Prefer not to answer/Préfère ne pas répondre

Please specify (e.g. change in dose or how often you take your pills):

Veuillez préciser (par exemple, changement de dose ou à quelle fréquence vous prenez vos comprimés):

---

Do you currently take Amantadine (Symmetrel) as part of your treatment?

Prenez-vous actuellement de l'Amantadine (Symmetrel) dans le cadre de votre traitement médicamenteux?

- Yes/Oui
- No/Non
- Unsure/Incertain
- Prefer not to answer/Préfère ne pas répondre

Has the confinement period changed your physical activities?

Comment la période de confinement a-t-elle modifié vos activités physiques?

- Increase/Augmentation
- Decrease/Diminution
- No change/Pas de changement
- Prefer not to answer/Préfère ne pas répondre

Since the beginning of the confinement, have you been doing home exercises or online exercise programs?

Depuis le début de la période de confinement, participez-vous à des programmes d'exercices à domicile ou d'exercices en ligne?

- Yes/Oui
- No/Non
- Prefer not to answer/Préfère ne pas répondre



Since the beginning of the confinement period, how did you handle the follow-up visits with your neurologist?

Depuis le début de la période de confinement, de quelle manière s'effectue votre suivi avec votre neurologue?

- Appointment in person/Rendez-vous en personne
- Appointment by phone call/Rendez-vous téléphonique
- Appointment by video conference (tele-medicine)/Rendez-vous par vidéoconférence (télémédecine)
- I don't know/Je ne sais pas
- I didn't have my appointment yet/Je n'ai pas eu de suivi encore
- Other/Autre
- Prefer not to answer/Préfère ne pas répondre

If you selected other, please specify:

Si vous avez sélectionné autre, veuillez préciser:

---

What was your comfort level with using a video conference for your care?

Quel était votre niveau de confort face à l'utilisation d'une vidéoconférence pour vos soins?

- Extremely comfortable/Extrêmement confortable
- Very comfortable/Très confortable
- Slightly comfortable/Confortable
- Not comfortable/Pas confortable
- Not at all comfortable/Pas du tout confortable
- Prefer not to answer/Préfère ne pas répondre

If applicable, how do you feel your care needs were met by the "virtual visit" (either via phone or video conference)?

Le cas échéant, comment pensez-vous que vos besoins de soins médicaux ont été satisfaits lors de la "visite virtuelle" (par téléphone ou par vidéoconférence)?

- Extremely satisfied/Extrêmement satisfait
- Satisfied/Satisfait
- Neither satisfied nor dissatisfied/Ni satisfait ni insatisfait
- Dissatisfied/Insatisfait
- Extremely dissatisfied/Extrêmement insatisfait
- Not applicable/Non applicable
- Prefer not to answer/Préfère ne pas répondre

Would you like to receive care virtually in the future?

Dans l'avenir, aimeriez-vous recevoir des soins médicaux virtuellement?

- Yes/Oui
- No/Non
- Unsure/Incertain
- Prefer not to answer/Préfère ne pas répondre

Comments:

Commentaires :
